# Supplementary material for: Live and let die: a REM complex promotes fertilization through synergid cell death in Arabidopsis
Source: Oxford University Press journal article supplement (doi:10.1242/dev.134916), 2016-06-24
Supplement: dev134916supp.pdf [file dev134916supp.pdf]

**Table S1.** Correlation analysis of STK vs all genome, p(LIN) and p(LOG). Pearson coef.  $> 0.6$  . Different colours were used to identify the best correlators - genes that present a high coefficient Lin or Log- with STK (table S1) and VDD (table S2). Interestingly 10 out of the best 15 correlators of STK (67%) are among the best 20 correlators of VDD. Table can be accessed on Figshare at <https://dx.doi.org/10.6084/m9.figshare.3464054.v2>.

**Table S2.** Correlation analysis of VDD vs all genome, p(LIN) and p(LOG). Pearson coef.  $> 0.6$ . Table can be accessed on Figshare at <https://dx.doi.org/10.6084/m9.figshare.3464057.v2>.

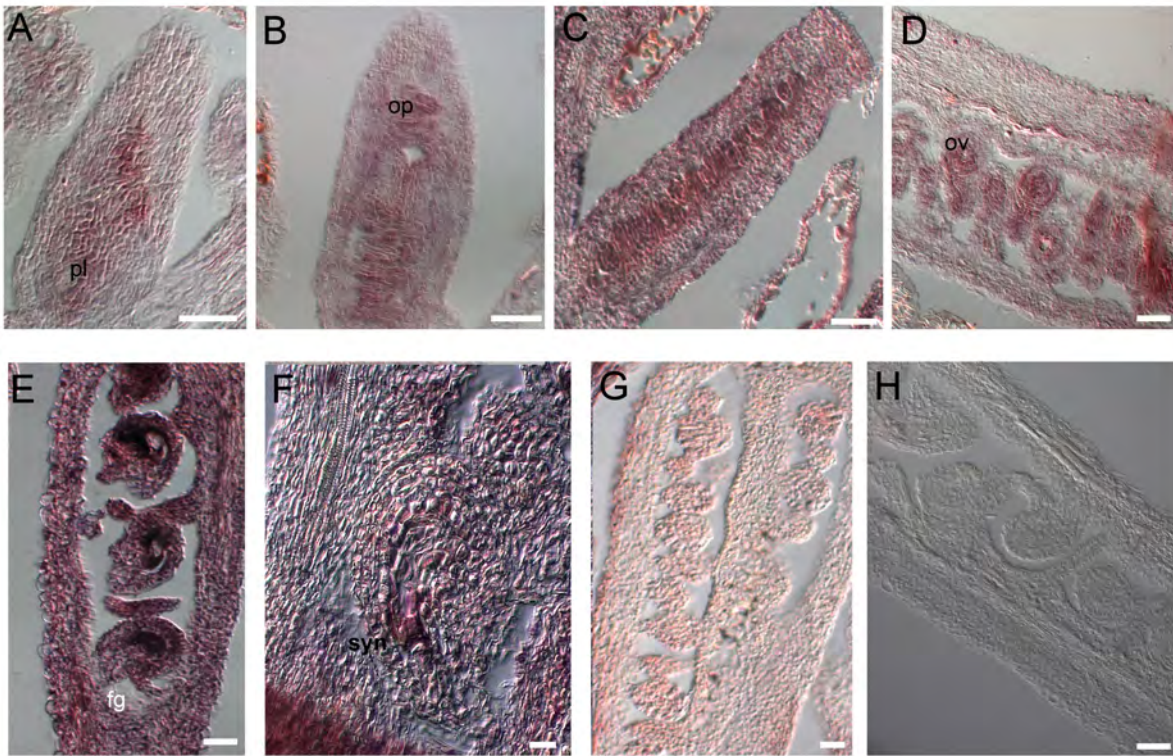

### Supplemental Figure 1- *VAL* in situ hybridization

(A-F) *In situ* hybridization experiments performed using wild-type plants: (A-C) *VAL* gene is expressed in the early stages of ovule development; (D) *VAL* mRNA is detectable as a strong signal during later stages of ovule formation; (E) In the mature ovule *VAL* expression is highly detectable inside the embryo sac; (F) mature ovule detail, strong *VAL* expression inside the embryo sac more precisely in the synergid cells zone (syn). (G) *In situ* hybridization experiment performed in *stk* single mutant, the *VAL* signal is reduced. (H) Experiment performed in *stkshp1shp2* triple mutant background, almost any signal was detected. pl-placenta; op-ovule primordia; ov-ovule; fg-female gametophyte. Scale bars: 50µm.

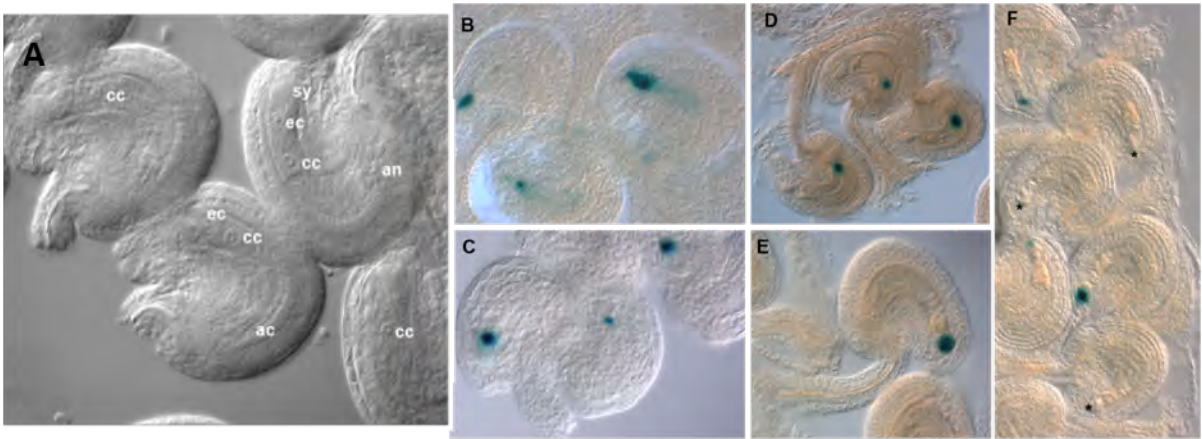

|                      | Genotype  | Ovules with signal (%) | Ovules without signal (%) | Unfertilized ovules (%) |
|----------------------|-----------|------------------------|---------------------------|-------------------------|
| Antipodal cells (F2) | wild-type | 97%                    | 3%                        | 3%                      |
|                      | VAL_RNAi  | 92%                    | 8%                        | 30%                     |
| Egg cell (F2)        | wild-type | 95%                    | 5%                        | 4%                      |
|                      | VAL_RNAi  | 95%                    | 5%                        | 27%                     |
| Central cell (F2)    | wild-type | 98%                    | 2%                        | 2%                      |
|                      | VAL_RNAi  | 95%                    | 5%                        | 37%                     |
| Synergid cells (F2)  | wild-type | 95% (n=267)            | 5% (n=16)                 | 2%                      |
|                      | VAL_RNAi  | 62,5%(n=500)           | 37,5% (n=300)             | 37%                     |

**Supplemental Figure 2- Embryo sac cells markers in VAL\_RNAi**

(A) Differential interference contrast microscopy (DIC) analysis of VAL\_RNAi ovules. The ovules are morphologically indistinguishable from the wild type ones, the embryo sac is composed by seven cells. (B-E) Embryo sac cell markers expression in VAL\_RNAi: (B) egg cell; (C) central central; (D) antypodals and (E-F) synergid cells. The bottom table presents all the percentages and number of ovules analysed. sy- synergids; ec-egg cell; cc- central cell; an- antipodal cells.

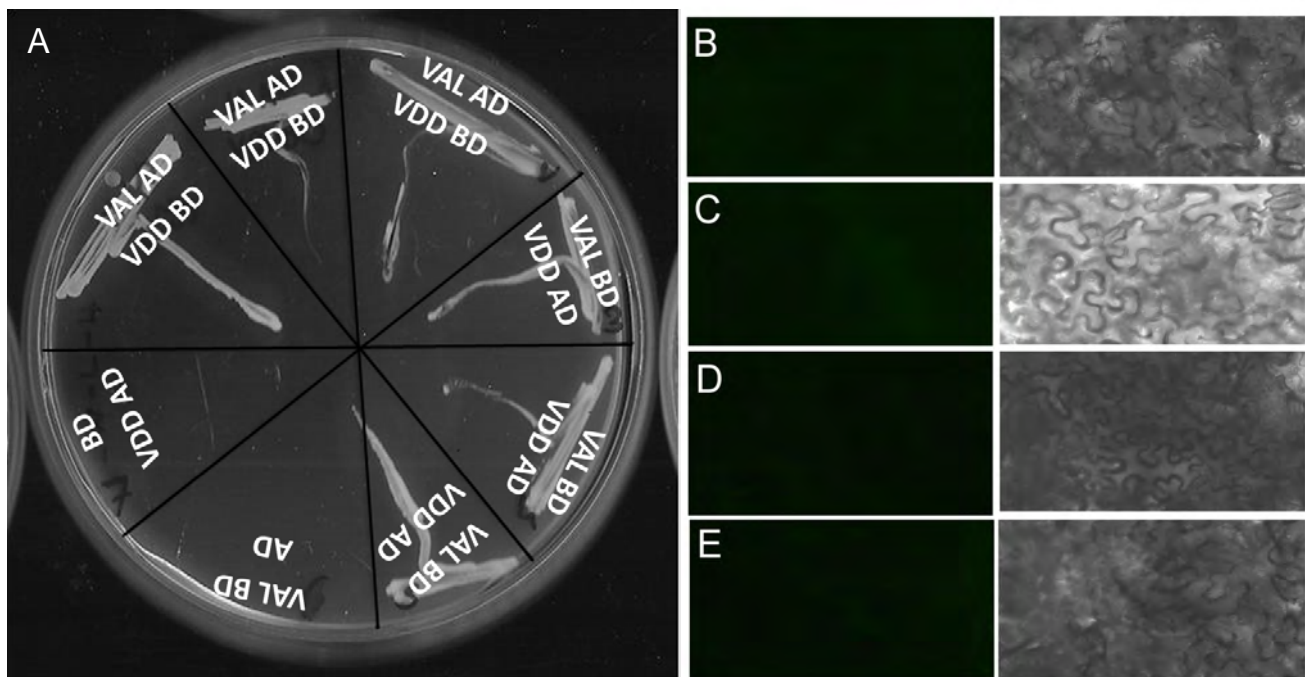

### Supplemental Figure 3- Yeast 2 Hybrid (Y2H) experiment and negative BiFC controls

(A) Y2H assay, positive interactions were found for VDD AD versus VAL BD, and vice versa, the colonies growth in -W-L-H + 5mM 3AT selective medium. As negative controls we tested VAL BD vector for empty AD and VDD AD for empty BD vector. (B-E) BiFC negative controls: (B) VDD\_YFN plus empty YFC vector; (C) VDD\_YFC plus empty YFN vector; (D) VAL\_YFN plus empty YFC vector; (E) VAL\_YFC plus empty YFN vector.



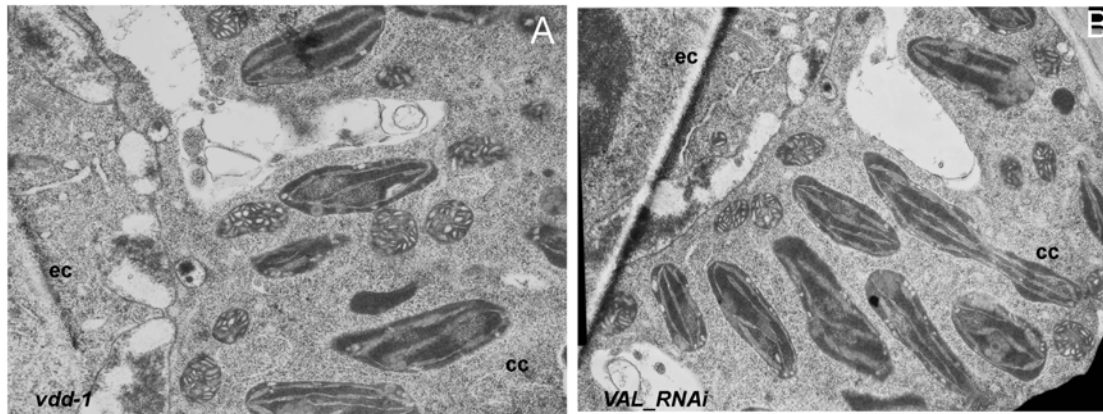

**Supplemental Figure 4- TEM imaging of intact egg and central cells in *vdd-1* and *VAL\_RNAi***

Those ovules in which the female gametophyte remained unfertilized, regularly featured intact egg and central cells: (A) *vdd-1*; (B) *VAL\_RNAi* lines. ec-egg cell, cc- central cell.

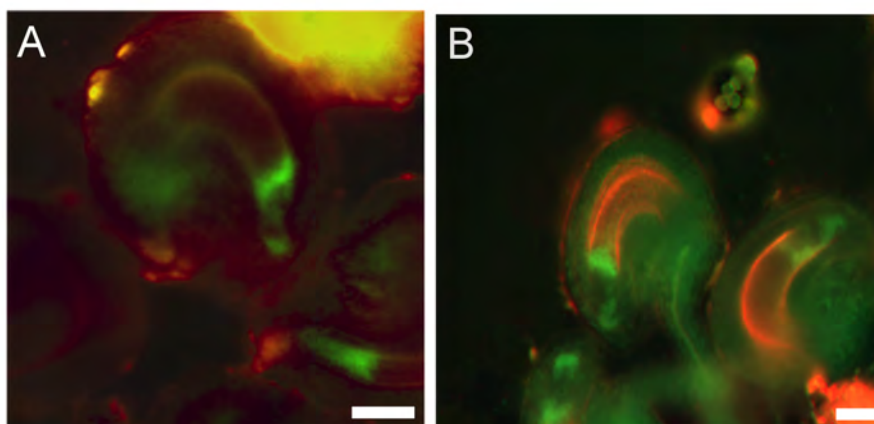

**Supplemental Figure 5- *FER\_GFP* in *vdd-1* and *VAL\_RNAi***

(A) *FER\_GFP* in *vdd-1*, *FER* protein localization in the synergids region (n=50 ovules); (B) *FER\_GFP* in *VAL\_RNAi* background (n=50 ovules). scale bars: 50  $\mu$ m
